# Supplementary material for: Sequence and structural properties of circular RNAs in the brain of nurse and forager honeybees (Apis mellifera)
Source: PubMed Central journal article supplement (PMC6347836; doi:10.1186/s12864-018-5402-6), 2019-01-25

## Additional File 1 — Splicing

Supplemental Figure 1: Intronic splice site motif. (A) Flanking introns of circRNA junctions exhibit a fairly common  $\text{ttxcAG/GTaa}$  motif (visualized with WebLogo 3.4). (B) Among our high confidence circRNAs, only five showed non-canonical AG/GT junctions which, however, correlated with annotated exon boundaries. Acceptor sequences (yellow) are canonical while the donor sequence (gray) deviates in these cases. Small letters indicate regions marked for low complexity.

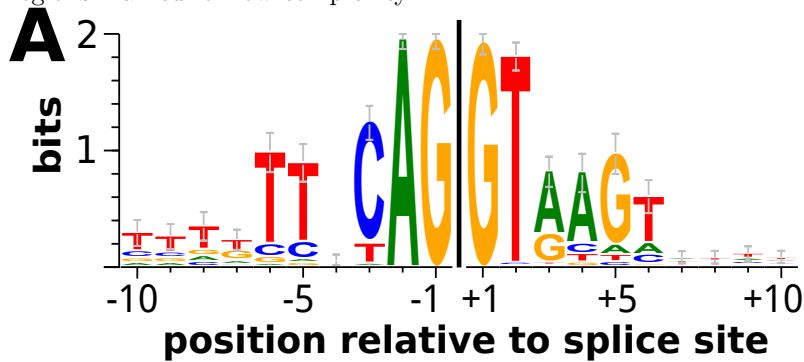

**B** ame\_circ\_0000163 (GB42249)  
 ...ATTGTTCC**AG** **TGAGCCTGCA**...

ame\_circ\_0000217 (GB51545)  
 ...CTCGTTAC**AG** **GCAAGTTGTC**...

ame\_circ\_0000459 (GB55429)  
 ...tcttcttc**ag** **GCGAGACGAT**...

ame\_circ\_0001966 (GB43138)  
 ...TCTATTCC**AG** **GCGAGTAACA**...

ame\_circ\_0002139 (GB11622)  
 ...AAATTTAC**AG** **GCAAGtccat**...

Supplemental Figure 2: Ambiguous transcript assignment. There is currently no annotated isoform of LOC408309 which includes both exons of circRNA *ame\_circ\_0001877*. Both exons are part of a different 5'-UTR and end with a coding region. The circRNA is well supported with 121 JSRs and likely a result of an excision from one of the longer isoforms of the transcript that contain neither of the two exons (e.g. XM\_006566436.2).

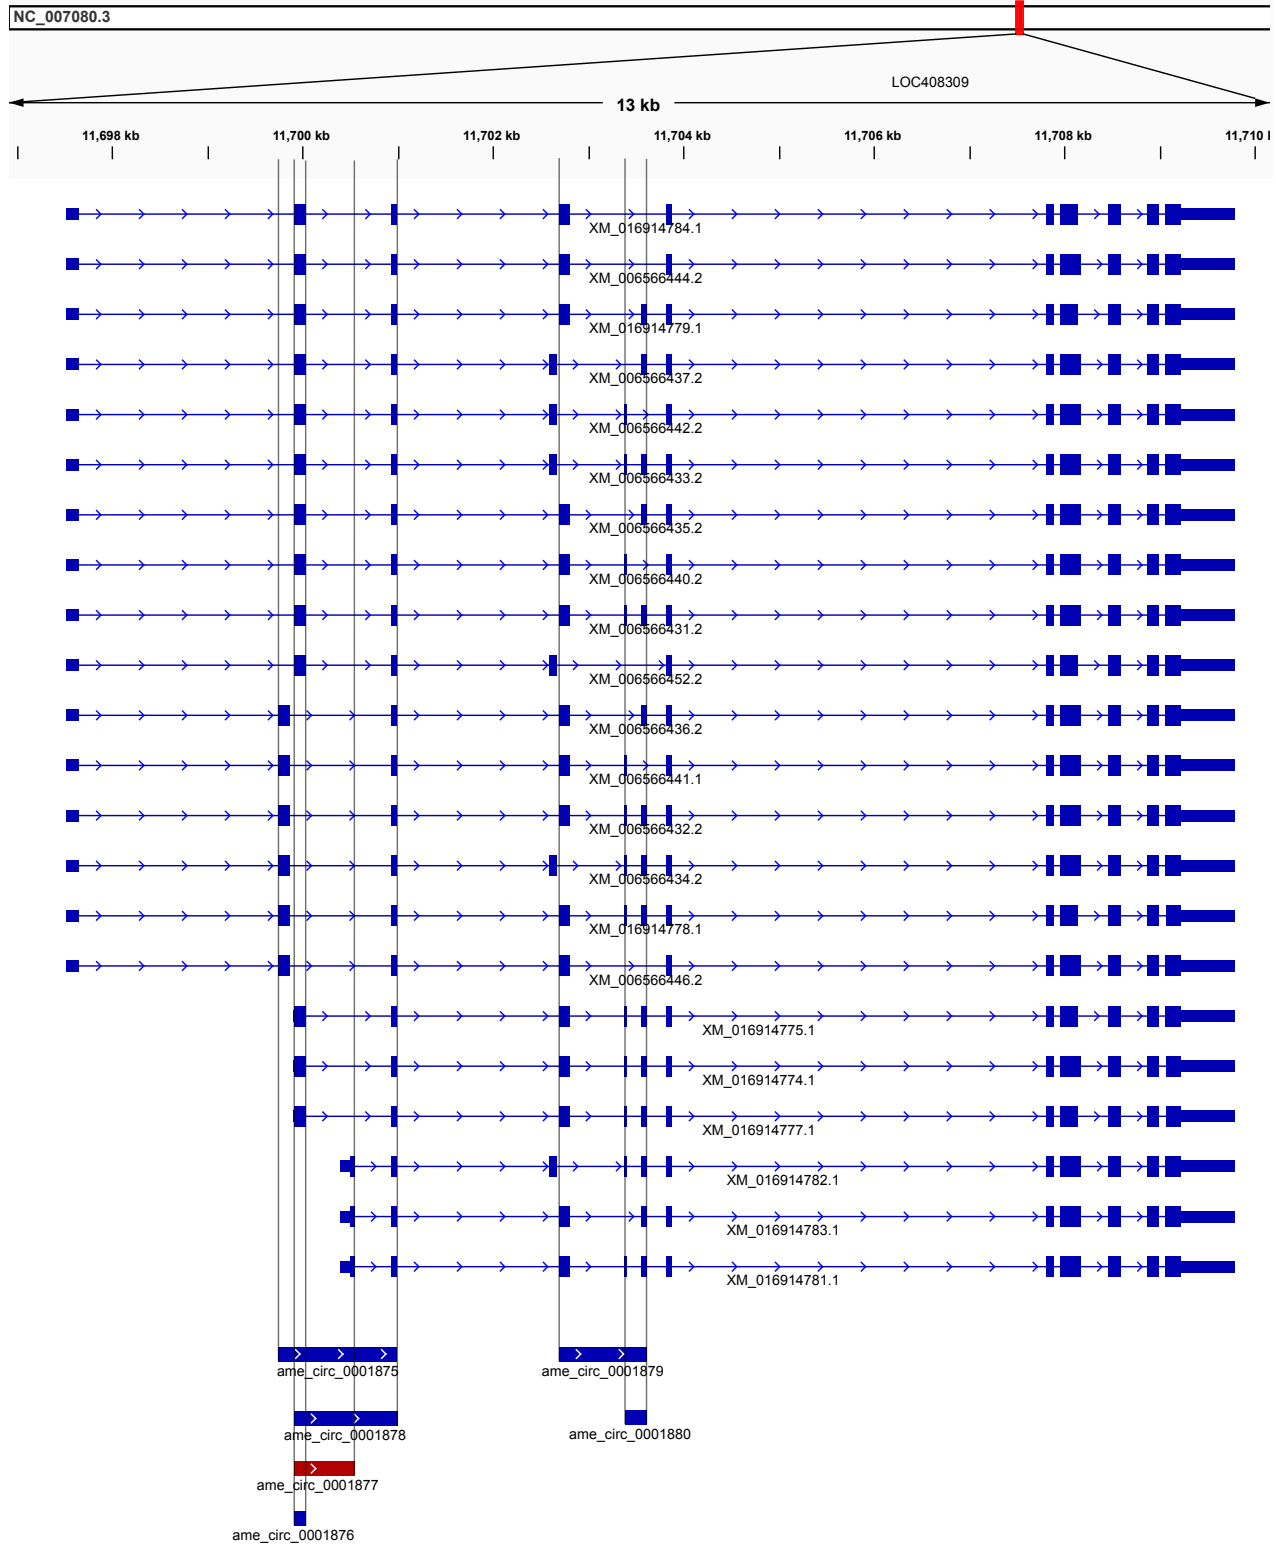

Supplement: 12864_2018_5402_MOESM1_ESM.pdf [file 12864_2018_5402_MOESM1_ESM.pdf]
