# Supplementary material for: Sequence and structural properties of circular RNAs in the brain of nurse and forager honeybees (Apis mellifera)
Source: PubMed Central journal article supplement (PMC6347836; doi:10.1186/s12864-018-5402-6), 2019-01-25

## Additional File 7 — RNase R enrichment control

Supplemental Figure 3: qPCR control of circRNA enrichment. The enrichment of circRNA candidates *circAmrmsmep2* and *circAmrad* using RNase R is compared to the effect on the linear *circAmef1 $\alpha$* . Left: The RNA concentration of the linear reference gene *circAmef1 $\alpha$*  decreases upon RNase R treatment compared to the untreated control as indicated by increased Ct values. Reversely, the circular RNA candidate *circAmrmsmep2* is efficiently enriched after RNase R treatment. Right: Similar to left but compared to circular RNA candidate *circAmrad*. Each run was performed in five technical replicates.

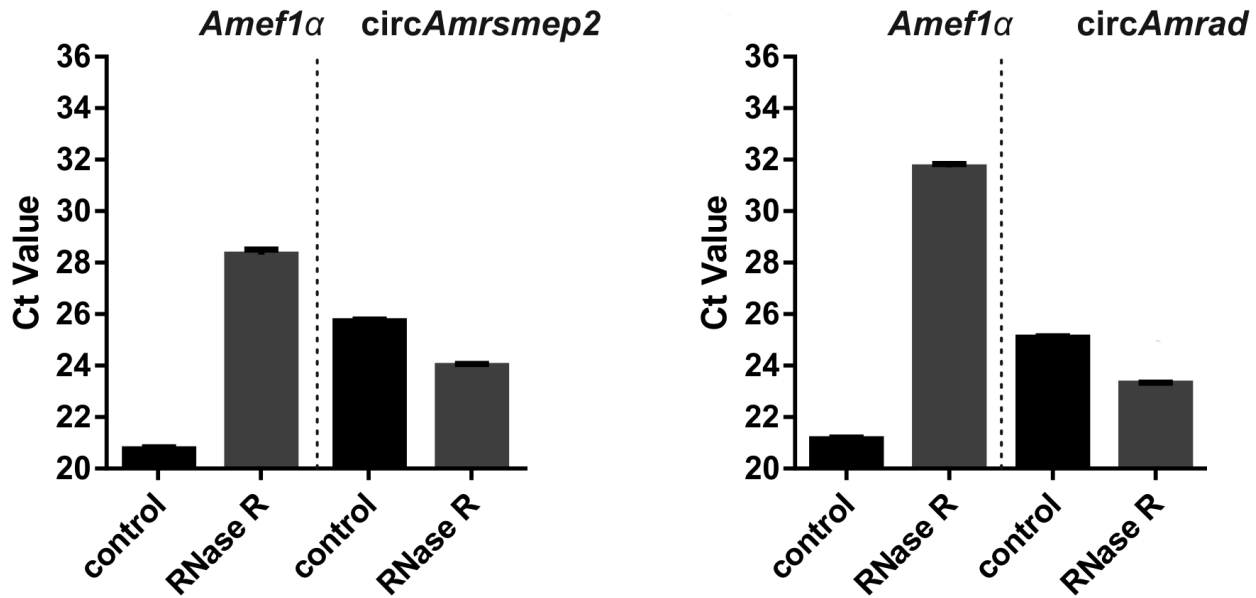

Supplement: 12864_2018_5402_MOESM6_ESM.pdf [file 12864_2018_5402_MOESM6_ESM.pdf]
